# Supplementary material
Source: MDPI journal article supplement (https://www.mdpi.com/2571-6255/6/9/341)
Supplement: s1 [file s1]

# Fertile Island Soils Promote the Restoration of Shrub Patches in Burned Areas in Arid Saline Land

Shilin Wang <sup>1,2</sup>, Xiaojun Wang <sup>1,2</sup> and Wenxia Cao <sup>1,2,\*</sup>

<sup>1</sup> College of Pratacultural Science, Gansu Agricultural University, Lanzhou 730070, China; wang-shilin@outlook.com (S.W.); wangxiaojunchn@163.com (X.W.)

<sup>2</sup> Key Laboratory of Grassland Ecosystem, Ministry of Education, Lanzhou 730070, China

\* Correspondence: caowx@gsau.edu.cn; Tel.: +86-0931-7632829

**Table S1.** Features of plant species restoration in burned shrubland (*T. ramosissima*).

| Plant species                 | Height (cm)   | Density (ind./m <sup>2</sup> ) | Coverage (%) | Biomass (g/m <sup>2</sup> ) |
|-------------------------------|---------------|--------------------------------|--------------|-----------------------------|
| <i>Cirsium arvense</i>        | 13.21 ± 4.26  | 12.23 ± 6.58                   | 2.33 ± 1.05  | 12.36 ± 6.55                |
| <i>Agropyron desertorum</i>   | 21.42 ± 8.61  | 114.15 ± 52.16                 | 10.62 ± 4.78 | 56.85 ± 25.63               |
| <i>Leymus secalinus</i>       | 19.25 ± 8.04  | 63.56 ± 41.21                  | 9.59 ± 4.30  | 40.39 ± 23.41               |
| <i>Phragmites australis</i>   | 5.26 ± 2.01   | 8.07 ± 5.17                    | 2.34 ± 1.06  | 5.97 ± 4.59                 |
| <i>Calamagrostis epigeios</i> | 28.41 ± 13.25 | 32.26 ± 23.27                  | 3.66 ± 1.65  | 10.34 ± 7.13                |
| <i>Artemisia hedinii</i>      | 14.51 ± 2.23  | 2.26 ± 1.11                    | 0.95 ± 0.43  | 0.97 ± 0.63                 |
| <i>Lactuca sibirica</i>       | 13.05 ± 5.91  | 2.13 ± 1.73                    | 1.58 ± 0.71  | 3.17 ± 1.20                 |
| <i>Neotrinia splendens</i>    | 10.27 ± 6.41  | 12.74 ± 8.41                   | 5.07 ± 2.28  | 21.54 ± 10.23               |
| <i>Inula salsoloides</i>      | 7.21 ± 2.04   | 0.84 ± 0.67                    | 1.06 ± 0.61  | 1.41 ± 1.02                 |
| <i>Chenopodium album</i>      | 5.63 ± 3.11   | 2.13 ± 1.84                    | 0.88 ± 0.39  | 3.08 ± 1.52                 |
| <i>Suaeda glauca</i>          | 11.73 ± 4.59  | 3.07 ± 2.09                    | 4.12 ± 1.85  | 7.16 ± 4.64                 |
| <i>Taraxacum mongolicum</i>   | 5.67 ± 3.07   | 5.36 ± 3.45                    | 1.49 ± 0.67  | 2.91 ± 2.17                 |
| <i>Grubovia dasyphylla</i>    | 10.07 ± 5.17  | 4.12 ± 2.97                    | 1.32 ± 0.59  | 5.75 ± 3.07                 |
